# Supplementary material for: Meta-analytic evidence for the anti-aging effect of hormesis on Caenorhabditis elegans
Source: PubMed Central journal article supplement (PMC7041774; doi:10.18632/aging.102773), 2020-02-07
Supplement: aging-12-102773-s001..pdf [file aging-12-102773-s001..pdf]

## SUPPLEMENTARY TABLE WITH REFERENCES

**Supplementary Table 1. The basic information of included papers.**

| Reference                  | Treatment | Dose      | Indicator            | Source        | Note                |
|----------------------------|-----------|-----------|----------------------|---------------|---------------------|
| Akhoon et al., 2016 [1]    | WA        | 5 $\mu$ M | ML                   | Table 1       |                     |
|                            |           |           | Lipofuscin           | Fig. 1B       |                     |
|                            |           |           | Bend                 | Fig. 2A       | Day 1 adulthood     |
|                            |           |           | Bend                 | Fig. 2A       | Day 3 adulthood     |
|                            |           |           | Bend                 | Fig. 2A       | Day 5 adulthood     |
|                            |           |           | <i>daf-16</i>        | Fig. 9        |                     |
|                            |           |           | <i>sod-3</i>         | Fig. 9        |                     |
| Chou et al., 2019 [2]      | STS       | 2-day     | ML                   | Fig. S1B      | Young-age           |
|                            |           |           | ML                   | Fig. S1B      | Mid-age             |
|                            |           |           | ML                   | Fig. S1B      | Repetitive fasting  |
|                            |           |           | CML                  | Fig. S1B      | Young-age           |
|                            |           |           | CML                  | Fig. S1B      | Mid-age             |
|                            |           |           | CML                  | Fig. S1B      | Repetitive fasting  |
|                            |           |           | <i>sod-3</i>         | Fig. 1e       | Young-age           |
|                            |           |           | <i>sod-3</i>         | Fig. 1e       | Mid-age             |
|                            |           |           | <i>sod-3</i>         | Fig. 1e       | Repetitive fasting  |
|                            |           |           | Kim et al., 2010 [3] | [TAT-PtBP-Pt] | 5 $\mu$ M           |
| ML                         | Table 2   |           |                      |               |                     |
| OML                        | Table 2   |           |                      |               |                     |
| Kishimoto et al., 2017 [4] | As        | 1 mM      | OML                  | Table S1      | P0                  |
|                            |           |           | Bend                 | Fig. 2a       | P0, day 4 adulthood |
|                            |           |           | Bend                 | Fig. 2a       | P0, day 6 adulthood |
|                            | NaCl      | 150 mM    | OML                  | Table S1      | P0                  |
|                            |           |           | Bend                 | Fig. 2a       | P0, day 4 adulthood |
|                            |           |           | Bend                 | Fig. 2a       | P0, day 6 adulthood |
|                            | Fasting   | 1 day     | OML                  | Table S1      | P0                  |

|                           |              |              |              |          |                                              |
|---------------------------|--------------|--------------|--------------|----------|----------------------------------------------|
|                           |              |              | Bend         | Fig. 2a  | P0, day 4 adulthood                          |
|                           |              |              | Bend         | Fig. 2a  | P0, day 6 adulthood                          |
| Kogure et al., 2017 [5]   | IF           | 2-3 days     | ML           | Table 1  |                                              |
|                           |              |              | <i>sod-3</i> | Fig. 5   |                                              |
| Kronberg et al., 2018 [6] | Glyphosate F | 4.8 mM       | <i>sod-3</i> | Fig. 2   |                                              |
|                           |              |              | <i>ctl-1</i> | Fig. 2   |                                              |
|                           |              |              | <i>ctl-1</i> | Fig. 3A  |                                              |
| Olsen et al., 2006 [7]    | RHS          | 33°C for 4 h | ML           | Table 1  | Treatment on the 4th and 8th day             |
|                           |              |              | ML           | Table 1  | Treatment on the 4th, 8th and 12th day       |
|                           |              |              | ML           | Table 1  | Treatment on the 4th, 8th, 12th and 16th day |
|                           |              |              | ML           | Table 1  | Treatment on the 8th and 12th day            |
|                           |              |              | ML           | Table 1  | Treatment on the 8th, 12th and 16th day      |
|                           |              |              | ML           | Table 1  | Treatment on the 4th and 12th day            |
|                           |              |              | ML           | Table 1  | Treatment on the 4th and 16th day            |
|                           |              |              | ML           | Table 1  | Treatment on the 12th and 16th day           |
| Pandey et al., 2018 [8]   | JBEO         | 10 ppm       | ML           | Table 2  |                                              |
|                           |              |              | Pumpin g     | Fig. 4   | Day 2 adulthood                              |
|                           |              |              | Pumpin g     | Fig. 4   | Day 5 adulthood                              |
|                           |              |              | Pumpin g     | Fig. 4   | Day 10 adulthood                             |
|                           |              |              | Lipofus cin  | Fig. 7C  |                                              |
| Pietsch et al., 2011 [9]  | Q            | 200 μM       | ML           | Table S1 |                                              |
|                           |              |              | Pumpin g     | Fig. 3a  | Day 3 adulthood                              |
|                           |              |              | Pumpin g     | Fig. 3a  | Day 6 adulthood                              |
|                           |              |              | Pumpin g     | Fig. 3a  | Day 10 adulthood                             |
|                           |              |              | Lipofus cin  | Fig. 5h  |                                              |
|                           | CA           | 300 μM       | ML           | Table S2 |                                              |
|                           |              |              | Pumpin g     | Fig. 3a  | Day 3 adulthood                              |
|                           |              |              | Pumpin g     | Fig. 3a  | Day 6 adulthood                              |
|                           |              |              | Pumpin g     | Fig. 3a  | Day 10 adulthood                             |
|                           |              |              | Lipofus cin  | Fig. 5h  |                                              |

|                              |                  |                |                 |          |                  |
|------------------------------|------------------|----------------|-----------------|----------|------------------|
|                              | RA               | 200 $\mu$ M    | ML              | Table S3 |                  |
|                              |                  |                | Pumpin g        | Fig. 3a  | Day 3 adulthood  |
|                              |                  |                | Pumpin g        | Fig. 3a  | Day 6 adulthood  |
|                              |                  |                | Pumpin g        | Fig. 3a  | Day 10 adulthood |
|                              |                  |                | Lipofus cin     | Fig. 5h  |                  |
| Rathor et al., 2015 [10]     | FA               | 25 $\mu$ M     | ML              | Table 1  |                  |
|                              |                  |                | Pumpin g        | Fig. 2b  | 2-day-old        |
|                              |                  |                | Pumpin g        | Fig. 2b  | 5-day-old        |
|                              |                  |                | Pumpin g        | Fig. 2b  | 10-day-old       |
|                              |                  |                | Lipofus cin     | Fig. 5   |                  |
|                              |                  |                | <i>daf-16</i>   | Fig. 9   |                  |
|                              |                  |                | <i>sod-3</i>    | Fig. 9   |                  |
| Rathor and Pandey, 2018 [11] | BOB              | 25 $\mu$ M     | ML              | Table 1  |                  |
|                              |                  |                | Pumpin g        | Fig. 3A  | Day 5 adulthood  |
|                              |                  |                | Pumpin g        | Fig. 3A  | Day 10 adulthood |
|                              |                  |                | Bend            | Fig. 3C  | Day 5 adulthood  |
|                              |                  |                | Bend            | Fig. 3C  | Day 10 adulthood |
|                              |                  |                | Lipofus cin     | Fig. 7C  |                  |
|                              |                  |                | <i>daf-16</i>   | Fig. 11  |                  |
|                              |                  |                | <i>sod-3</i>    | Fig. 11  |                  |
|                              |                  |                | <i>hsp-16.2</i> | Fig. 11  |                  |
|                              |                  |                | <i>ctl-1</i>    | Fig. 11  |                  |
| Schmeisser et al., 2013 [12] | AsO <sub>2</sub> | 0.1 $\mu$ M    | ML              | Table 1  |                  |
| Shanmugam et al., 2018 [13]  | Phytochemicals   | 300 $\mu$ g/mL | ML              | Table 1  |                  |
| Shukla et al., 2012 [14]     | 4-HEG            | 20 $\mu$ M     | ML              | Table 2  |                  |
|                              |                  |                | Pumpin g        | Fig. 5A  | Young            |
|                              |                  |                | Pumpin g        | Fig. 5A  | Day 5 adulthood  |
|                              |                  |                | <i>hsp-16.2</i> | Fig. 7   |                  |
|                              |                  |                | <i>sod-3</i>    | Fig. 7   |                  |
| Urban et al., 2017 [15]      | DEM              | 100 $\mu$ M    | ML              | Table 2  |                  |

|                          |                                   |                         |                 |         |                               |
|--------------------------|-----------------------------------|-------------------------|-----------------|---------|-------------------------------|
|                          |                                   |                         | OML             | Table 3 |                               |
|                          |                                   |                         | <i>sod-3</i>    | Fig. 5A | Treatment for 1 day           |
|                          |                                   |                         | <i>sod-3</i>    | Fig. 5A | Treatment for 2 days          |
|                          |                                   |                         | <i>sod-3</i>    | Fig. 5A | Treatment for 3 days          |
|                          |                                   |                         | <i>sod-3</i>    | Fig. 5A | Treatment for 5 days          |
|                          |                                   |                         | <i>sod-3</i>    | Fig. 5A | Treatment for 7 days          |
|                          |                                   |                         | <i>sod-3</i>    | Fig. 5A | Treatment for 10 days         |
|                          |                                   |                         | <i>ctl-1</i>    | Fig. 5B | Treatment for 1 day           |
|                          |                                   |                         | <i>ctl-1</i>    | Fig. 5B | Treatment for 2 days          |
|                          |                                   |                         | <i>ctl-1</i>    | Fig. 5B | Treatment for 3 days          |
|                          |                                   |                         | <i>ctl-1</i>    | Fig. 5B | Treatment for 5 days          |
|                          |                                   |                         | <i>ctl-1</i>    | Fig. 5B | Treatment for 7 days          |
|                          |                                   |                         | <i>ctl-1</i>    | Fig. 5B | Treatment for 10 days         |
| Wang et al., 2010a [16]  | Pre-treatment with UV irradiation | 10J/m <sup>2</sup> /min | Bend            | Fig. 3  | Post-treatment with 50 μM Hg  |
|                          |                                   |                         | Bend            | Fig. 3  | Post-treatment with 100 μM Hg |
|                          |                                   |                         | Bend            | Fig. 3  | Post-treatment with 200 μM Hg |
|                          |                                   |                         | Bend            | Fig. 3  | Post-treatment with 50 μM Pb  |
|                          |                                   |                         | Bend            | Fig. 3  | Post-treatment with 100 μM Pb |
|                          |                                   |                         | Bend            | Fig. 3  | Post-treatment with 200 μM Pb |
|                          |                                   |                         | Bend            | Fig. 3  | Post-treatment with 50 μM Cr  |
|                          |                                   |                         | Bend            | Fig. 3  | Post-treatment with 100 μM Cr |
|                          |                                   |                         | Bend            | Fig. 3  | Post-treatment with 200 μM Cr |
| Wang et al., 2010b [17]  | DMSO                              | 0.5%                    | ML              | Table 1 |                               |
|                          |                                   |                         | HML             | Fig. 2B | The first trial               |
|                          |                                   |                         | <i>hsp-16.2</i> | Fig. 2D |                               |
| Wang and Xing, 2009 [18] | Pre-treatment with Pb             | 2.5 μM                  | Bend            | Fig. 3  | Post-treatment with 50 μM Pb  |
|                          |                                   |                         | Bend            | Fig. 3  | Post-treatment with 100 μM Pb |
|                          | Pre-treatment with Hg             | 2.5 μM                  | Bend            | Fig. 3  | Post-treatment with 50 μM Hg  |
|                          |                                   |                         | Bend            | Fig. 3  | Post-treatment with 100 μM Hg |
|                          | Pre-treatment with Cu             | 2.5 μM                  | Bend            | Fig. 3  | Post-treatment with 50 μM Cu  |

|                             |                       |             |               |         |                                    |
|-----------------------------|-----------------------|-------------|---------------|---------|------------------------------------|
|                             |                       |             | Bend          | Fig. 3  | Post-treatment with 100 $\mu$ M Cu |
|                             | Pre-treatment with Cr | 2.5 $\mu$ M | Bend          | Fig. 3  | Post-treatment with 50 $\mu$ M Cr  |
|                             |                       |             | Bend          | Fig. 3  | Post-treatment with 100 $\mu$ M Cr |
| Wu et al., 2019 [19]        | Ethanol               | 2%          | ML            | Table 2 |                                    |
|                             |                       |             | Bend          | Fig. 2  |                                    |
|                             |                       |             | Pumpin g      | Fig. 2  |                                    |
| Xu et al., 2017 [20]        | Convallatoxin         | 20 $\mu$ M  | Pumpin g      | Fig. 2C | 4-day-old                          |
|                             |                       |             | Pumpin g      | Fig. 2C | 6-day-old                          |
|                             |                       |             | Pumpin g      | Fig. 2C | 8-day-old                          |
|                             |                       |             | Pumpin g      | Fig. 2C | 10-day-old                         |
|                             |                       |             | Pumpin g      | Fig. 2C | 12-day-old                         |
|                             |                       |             | Lipofus cin   | Fig. 2F |                                    |
|                             |                       |             | <i>daf-16</i> | Fig. 7  |                                    |
|                             |                       |             | <i>sod-3</i>  | Fig. 7  |                                    |
| Yanase and Ishii, 2008 [21] | Hyperoxia             | 90% oxygen  | ML            | Table 1 |                                    |
| Yu et al., 2011 [22]        | Ethanol               | 2%          | Bend          | Fig. 2A | Treatment for 3 days               |
|                             |                       |             | Bend          | Fig. 2A | Treatment for 5 days               |
|                             |                       |             | Bend          | Fig. 2A | Treatment for 7 days               |
|                             |                       |             | Bend          | Fig. 2A | Treatment for 9 days               |
|                             |                       |             | Bend          | Fig. 2A | Treatment for 11 days              |
|                             |                       |             | Bend          | Fig. 2A | Treatment for 13 days              |
|                             |                       |             | Bend          | Fig. 2A | Treatment for 15 days              |
|                             |                       |             | Pumpin g      | Fig. 2B | Treatment for 4 days               |
|                             |                       |             | Pumpin g      | Fig. 2B | Treatment for 5 days               |
|                             |                       |             | Pumpin g      | Fig. 2B | Treatment for 6 days               |
|                             |                       |             | Pumpin g      | Fig. 2B | Treatment for 7 days               |
| Zhang et al., 2015 [23]     | OA                    | 300 $\mu$ M | ML            | Table 1 |                                    |
|                             |                       |             | OML           | Table 2 |                                    |
|                             |                       |             | Pumpin g      | Fig. 3A | Day 3 adulthood                    |
|                             |                       |             | Pumpin g      | Fig. 3A | Day 6 adulthood                    |

|                        |           |              |                                                                                                                                                                                   |                                                                                                                                                       |                                                                                                                                                                                                                                                |
|------------------------|-----------|--------------|-----------------------------------------------------------------------------------------------------------------------------------------------------------------------------------|-------------------------------------------------------------------------------------------------------------------------------------------------------|------------------------------------------------------------------------------------------------------------------------------------------------------------------------------------------------------------------------------------------------|
|                        |           |              | Pumpin<br>g<br><i>daf-16</i><br><i>sod-3</i><br><i>hsp-16.2</i><br><i>ctl-1</i>                                                                                                   | Fig.<br>3A<br>Fig.<br>4C<br>Fig.<br>4C<br>Fig.<br>4C<br>Fig.<br>4C                                                                                    | Day 10 adulthood                                                                                                                                                                                                                               |
| Zhao et al., 2017 [24] | Emodin    | 150 $\mu$ M  | ML<br>OML<br>HML<br><i>sod-3</i><br><i>hsp-16.2</i><br><i>ctl-1</i>                                                                                                               | Table<br>1<br>Table<br>2<br>Table<br>2<br>Fig.<br>3E<br>Fig.<br>3E<br>Fig.<br>3E                                                                      |                                                                                                                                                                                                                                                |
| Zhou et al., 2017 [25] | Arbutin   | 5 mM         | ML<br>HML<br>OML<br>UML<br><i>daf-16</i><br><i>sod-3</i><br><i>hsp-16.2</i>                                                                                                       | Fig. 1<br>Fig. 2A<br>Fig. 2B<br>Fig. 2C<br>Fig.<br>6A<br>Fig.<br>6B<br>Fig.<br>6C                                                                     |                                                                                                                                                                                                                                                |
| Zhu et al., 2016 [26]  | [OMMIM]Br | 0.01<br>mg/L | ML<br>Lipofus<br>cin<br>Lipofus<br>cin<br>Lipofus<br>cin<br>Lipofus<br>cin<br>Lipofus<br>cin<br><i>daf-16</i><br><i>daf-16</i><br><i>daf-16</i><br><i>daf-16</i><br><i>daf-16</i> | Fig.<br>2<br>Fig.<br>4A<br>Fig.<br>4A<br>Fig.<br>4A<br>Fig.<br>4A<br>Fig.<br>4A<br>Fig.<br>4A<br>Fig.<br>5B<br>Fig.<br>5B<br>Fig.<br>5B<br>Fig.<br>5B | Treatment for 2 days<br>Treatment for 5 days<br>Treatment for 7 days<br>Treatment for 9 days<br>Treatment for 11 days<br>Treatment for 2 days<br>Treatment for 5 days<br>Treatment for 7 days<br>Treatment for 9 days<br>Treatment for 11 days |
|                        | [DMMIM]Br | 0.01<br>mg/L | ML                                                                                                                                                                                | Fig. 2                                                                                                                                                |                                                                                                                                                                                                                                                |

|            |           |               |         |                       |
|------------|-----------|---------------|---------|-----------------------|
|            |           | Lipofuscin    | Fig. 4A | Treatment for 2 days  |
|            |           | Lipofuscin    | Fig. 4A | Treatment for 5 days  |
|            |           | Lipofuscin    | Fig. 4A | Treatment for 7 days  |
|            |           | Lipofuscin    | Fig. 4A | Treatment for 9 days  |
|            |           | Lipofuscin    | Fig. 4A | Treatment for 11 days |
|            |           | <i>daf-16</i> | Fig. 5B | Treatment for 2 days  |
|            |           | <i>daf-16</i> | Fig. 5B | Treatment for 5 days  |
|            |           | <i>daf-16</i> | Fig. 5B | Treatment for 7 days  |
|            |           | <i>daf-16</i> | Fig. 5B | Treatment for 9 days  |
|            |           | <i>daf-16</i> | Fig. 5B | Treatment for 11 days |
| [DoMMIM]Br | 0.01 mg/L | ML            | Fig. 2  |                       |
|            |           | Lipofuscin    | Fig. 4A | Treatment for 2 days  |
|            |           | Lipofuscin    | Fig. 4A | Treatment for 5 days  |
|            |           | Lipofuscin    | Fig. 4A | Treatment for 7 days  |
|            |           | Lipofuscin    | Fig. 4A | Treatment for 9 days  |
|            |           | Lipofuscin    | Fig. 4A | Treatment for 11 days |
|            |           | <i>daf-16</i> | Fig. 5B | Treatment for 2 days  |
|            |           | <i>daf-16</i> | Fig. 5B | Treatment for 5 days  |
|            |           | <i>daf-16</i> | Fig. 5B | Treatment for 7 days  |
|            |           | <i>daf-16</i> | Fig. 5B | Treatment for 9 days  |
|            |           | <i>daf-16</i> | Fig. 5B | Treatment for 11 days |

**Abbreviation:** CML, mean lifespan measured under cold stress; HML, mean lifespan measured under heat stress; NML, mean lifespan measured under normal condition; UML, mean lifespan measured under UV irradiation stress; *ctl-1*, *catalase-1*; *daf-16*, *dauer formation protein-16*; *hsp-16.2*, *small heat shock protein-16.2*; *sod-3*, *superoxide dismutase-3*. As, Arsenic; BOB, Boeravinone B; CA, Caffeic acid; DEM, Diethyl maleate; [DMMIM]Br, 1-decyl-2-methyl-3-methyl-imidazolium bromine; DMSO, Dimethyl sulfoxide; [DoMMIM]Br, 1-dodecyl-2-methyl-3-methyl-imidazolium bromine; FA, Folic acid; IF, Intermittent fasting; JBEO, Juniper berry essential oil; OA, Oleanolic acid; [OMMIM]Br, 1-octyl-2-methyl-3-methyl-imidazolium bromine; Q, Quercetin; RA, Rosmarinic acid; RHS, Repeated heat shock; STS, Short-term starvation; [TAT-PtBP-Pt], TAT-conjugated nano-Pt; WA, Withanolide A; 4-HEG, 4-Hydroxy-E-globularinin.

## SUPPLEMENTARY REFERENCES

1. Akhoun BA, Pandey S, Tiwari S, Pandey R. Withanolide A offers neuroprotection, ameliorates stress resistance and prolongs the life expectancy of *Caenorhabditis elegans*. *Exp Gerontol*. 2016; 78:47–56. <https://doi.org/10.1016/j.exger.2016.03.004> PMID:26956478
2. Chou WY, Lin YC, Lee YH. Short-term starvation stress at young adult stages enhances meiotic activity of germ cells to maintain spermatogenesis in aged male *Caenorhabditis elegans*. *Aging Cell*. 2019; 18:e12930. <https://doi.org/10.1111/acer.12930> PMID:30816005
3. Kim J, Shirasawa T, Miyamoto Y. The effect of TAT conjugated platinum nanoparticles on lifespan in a nematode *Caenorhabditis elegans* model. *Biomaterials*. 2010; 31:5849–54. <https://doi.org/10.1016/j.biomaterials.2010.03.077> PMID:20434216
4. Kishimoto S, Uno M, Okabe E, Nono M, Nishida E. Environmental stresses induce transgenerationally inheritable survival advantages via germline-to-soma communication in *Caenorhabditis elegans*. *Nat Commun*. 2017; 8:14031. <https://doi.org/10.1038/ncomms14031> PMID:28067237
5. Kogure A, Uno M, Ikeda T, Nishida E. The microRNA machinery regulates fasting-induced changes in gene expression and longevity in *Caenorhabditis elegans*. *J Biol Chem*. 2017; 292:11300–09. <https://doi.org/10.1074/jbc.M116.765065> PMID:28507100
6. Kronberg MF, Clavijo A, Moya A, Rossen A, Calvo D, Pagano E, Munarriz E. Glyphosate-based herbicides modulate oxidative stress response in the nematode *Caenorhabditis elegans*. *Comp Biochem Physiol C Toxicol Pharmacol*. 2018; 214:1–8. <https://doi.org/10.1016/j.cbpc.2018.08.002> PMID:30142450
7. Olsen A, Vantipalli MC, Lithgow GJ. Lifespan extension of *Caenorhabditis elegans* following repeated mild hormetic heat treatments. *Biogerontology*. 2006; 7:221–30. <https://doi.org/10.1007/s10522-006-9018-x> PMID:16826446
8. Pandey S, Tiwari S, Kumar A, Niranjana A, Chand J, Lehri A, Chauhan PS. Antioxidant and anti-aging potential of Juniper berry (*Juniperus communis* L.) essential oil in *Caenorhabditis elegans* model system. *Ind Crops Prod*. 2018; 120:113–22. <https://doi.org/10.1016/j.indcrop.2018.04.066>
9. Pietsch K, Saul N, Chakrabarti S, Stürzenbaum SR, Menzel R, Steinberg CE. Hormetins, antioxidants and prooxidants: defining quercetin-, caffeic acid- and rosmarinic acid-mediated life extension in *C. elegans*. *Biogerontology*. 2011; 12:329–47. <https://doi.org/10.1007/s10522-011-9334-7> PMID:21503726
10. Rathor L, Akhoun BA, Pandey S, Srivastava S, Pandey R. Folic acid supplementation at lower doses increases oxidative stress resistance and longevity in *Caenorhabditis elegans*. *Age (Dordr)*. 2015; 37:113. <https://doi.org/10.1007/s11357-015-9850-5> PMID:26546011
11. Rathor L, Pandey R. Age-induced diminution of free radicals by Boeravinone B in *Caenorhabditis elegans*. *Exp Gerontol*. 2018; 111:94–106. <https://doi.org/10.1016/j.exger.2018.07.005> PMID:30004006
12. Schmeisser S, Schmeisser K, Weimer S, Groth M, Priebe S, Fazius E, Kuhlow D, Pick D, Einax JW, Guthke R, Platzer M, Zarse K, Ristow M. Mitochondrial hormesis links low-dose arsenite exposure to lifespan extension. *Aging Cell*. 2013; 12:508–17. <https://doi.org/10.1111/acer.12076> PMID:23534459
13. Govindan S, Amirthalingam M, Duraisamy K, Govindhan T, Sundararaj N, Palanisamy S. Phytochemicals-induced hormesis protects *Caenorhabditis elegans* against  $\alpha$ -synuclein protein aggregation and stress through modulating HSF-1 and SKN-1/Nrf2 signaling pathways. *Biomed Pharmacother*. 2018; 102:812–22. <https://doi.org/10.1016/j.biopha.2018.03.128> PMID:29605769
14. Shukla V, Yadav D, Phulara SC, Gupta MM, Saikia SK, Pandey R. Longevity-promoting effects of 4-hydroxy-E-globularinin in *Caenorhabditis elegans*. *Free Radic Biol Med*. 2012; 53:1848–56. <https://doi.org/10.1016/j.freeradbiomed.2012.08.594> PMID:23000058
15. Urban N, Tsitsipatis D, Hausig F, Kreuzer K, Erler K, Stein V, Ristow M, Steinbrenner H, Klotz LO. Non-linear impact of glutathione depletion on *C. elegans* life span and stress resistance. *Redox Biol*. 2017; 11:502–15. <https://doi.org/10.1016/j.redox.2016.12.003> PMID:28086197
16. Wang D, Liu P, Xing X. Pre-treatment with mild UV irradiation increases the resistance of nematode *Caenorhabditis elegans* to toxicity on locomotion behaviors from metal exposure. *Environ Toxicol Pharmacol*. 2010a; 29:213–22. <https://doi.org/10.1016/j.etap.2010.01.002> PMID:21787605



17. Wang X, Wang X, Li L, Wang D. Lifespan extension in *Caenorhabditis elegans* by DMSO is dependent on *sir-2.1* and *daf-16*. *Biochem Biophys Res Commun*. 2010b; 400:613–18.  
<https://doi.org/10.1016/j.bbrc.2010.08.113>  
PMID:20828537
18. Wang D, Xing X. Pre-treatment with mild metal exposure suppresses the neurotoxicity on locomotion behavior induced by the subsequent severe metal exposure in *Caenorhabditis elegans*. *Environ Toxicol Pharmacol*. 2009; 28:459–64.  
<https://doi.org/10.1016/j.etap.2009.07.008>  
PMID:21784043
19. Wu ZQ, Li K, Ma JK, Li ZJ. Effects of ethanol intake on anti-oxidant responses and the lifespan of *Caenorhabditis elegans*. *CYTA J Food*. 2019; 17:288–96.  
<https://doi.org/10.1080/19476337.2018.1564794>
20. Xu J, Guo Y, Sui T, Wang Q, Zhang Y, Zhang R, Wang M, Guan S, Wang L. Molecular mechanisms of anti-oxidant and anti-aging effects induced by convallatoxin in *Caenorhabditis elegans*. *Free Radic Res*. 2017; 51:529–44.  
<https://doi.org/10.1080/10715762.2017.1331037>  
PMID:28503972
21. Yanase S, Ishii N. Hyperoxia exposure induced hormesis decreases mitochondrial superoxide radical levels via Ins/IGF-1 signaling pathway in a long-lived age-1 mutant of *Caenorhabditis elegans*. *J Radiat Res* (Tokyo). 2008; 49:211–18.  
<https://doi.org/10.1269/jrr.07043> PMID:18285659
22. Yu X, Zhao W, Ma J, Fu X, Zhao ZJ. Beneficial and harmful effects of alcohol exposure on *Caenorhabditis elegans* worms. *Biochem Biophys Res Commun*. 2011; 412:757–62.  
<https://doi.org/10.1016/j.bbrc.2011.08.053>  
PMID:21871869
23. Zhang J, Lu L, Zhou L. Oleanolic acid activates *daf-16* to increase lifespan in *Caenorhabditis elegans*. *Biochem Biophys Res Commun*. 2015; 468:843–49.  
<https://doi.org/10.1016/j.bbrc.2015.11.042>  
PMID:26592451
24. Zhao X, Lu L, Qi Y, Li M, Zhou L. Emodin extends lifespan of *Caenorhabditis elegans* through insulin/IGF-1 signaling pathway depending on DAF-16 and SIR-2.1. *Biosci Biotechnol Biochem*. 2017; 81:1908–16.  
<https://doi.org/10.1080/09168451.2017.1365592>  
PMID:28831863
25. Zhou L, Fu X, Jiang L, Wang L, Bai S, Jiao Y, Xing S, Li W, Ma J. Arbutin increases *Caenorhabditis elegans* longevity and stress resistance. *PeerJ*. 2017; 5:e4170.  
<https://doi.org/10.7717/peerj.4170> PMID:29340230
26. Zhu CJ, Peng Y, Tong ZH, Lu LY, Cui YH, Yu HQ. Hormetic effect and mechanism of imidazolium-based ionic liquids on the nematode *Caenorhabditis elegans*. *Chemosphere*. 2016; 157:65–70.  
<https://doi.org/10.1016/j.chemosphere.2016.05.007>  
PMID:27209554
